# Supplementary material for: Methotrexate attenuates vascular inflammation through an adenosine-microRNA-dependent pathway
Source: eLife journal article supplement (doi:10.7554/elife.58064), 2021-01-08
Supplement: supp [file elife-58064-supp-v1.zip]

Archive with 14 entries (14 files):
- elife_poa_e58064_Figure_1_source_data_1.xlsx
- elife_poa_e58064_Figure_2_source_data_1.xlsx
- elife_poa_e58064_Figure_3_source_data_1.xlsx
- elife_poa_e58064_Transparent_Reporting_File.pdf
- elife_poa_e58064_Figure_1_Supplement_1.ai
- elife_poa_e58064_Figure_2_Supplement_1.pdf
- elife_poa_e58064_Figure_3_Supplement_1.ai
- elife_poa_e58064_Figure_3_Supplement_2.ai
- elife_poa_e58064_Figure_3_Supplement_3.ai
- elife_poa_e58064_Figure_4_Supplement_1.ai
- elife_poa_e58064_Figure_4_Supplement_2.ai
- elife_poa_e58064_Figure_5_Supplement_1.ai
- elife_poa_e58064_Figure_5_Supplement_2.ai
- elife_poa_e58064_Figure_5_Supplement_3.ai
