# Supplementary material for: Methotrexate attenuates vascular inflammation through an adenosine-microRNA-dependent pathway
Source: eLife journal article supplement (doi:10.7554/elife.58064), 2021-01-08
Supplement: supp [file elife-58064-supp-v1.zip › elife_poa_e58064_Figure_3_source_data_1.xlsx]

## Sheet: Fig1
Fig1A					Fig1B					Fig1C										Fig1D					Fig1E										Fig1F										Fig1G
Sample	Mean	SEM	Sample Size		Sample	Mean	SEM	Sample Size		Sample	Mean	SEM	Sample Size							Sample	Mean	SEM	Sample Size		Sample	Mean	SEM	Sample Size							Sample	Mean	SEM	Sample Size							Sample	Mean	SEM	Sample Size
CTL	0.983	0.03607	3		MTX (0 µM)	0.9983	0.007115	3		CTL	1.008	0.04563	3							CTL	1.066	0.05679	3		Ad (0 µM)	1.045	0.02428	3							CTL	1.008	0.04563	3							CTL	0.9407	0.03305	3
MTX	1.364	0.03586	3		MTX (0.1 µM)	1.081	0.04474	3		MTX (10 µM)-1h	1.263	0.01615	3							MTX	1.421	0.06656	3		Ad (1 µM)	1.119	0.1382	3							Ad (50 µM)-1h	1.157	0.02035	3							TNF-α	0.6049	0.04284	3
Atorvastatin	1.02	0.03692	3		MTX (1 µM)	1.337	0.01811	3		MTX (10 µM)-4h	1.439	0.05193	3							MTX+APCP	1.112	0.08777	3		Ad (5 µM)	1.316	0.0582	3							Ad (50 µM)-4h	1.588	0.03523	3							TNF-α+MTX	0.8938	0.04078	3
Mevastatin	0.9338	0.03607	3		MTX (10 µM)	1.456	0.03111	3		MTX (10 µM)-7h	1.355	0.01104	3												Ad (10 µM)	2.051	0.1197	3							Ad (50 µM)-7h	1.694	0.06655	3							TNF-α+Ad	1.341	0.1037	3
Simvastatin	0.9457	0.1136	3		MTX (100 µM)	1.34	0.01518	3		MTX (10 µM)-12h	1.171	0.03046	3												Ad (50 µM)	2.382	0.03865	3							Ad (50 µM)-12h	1.171	0.03046	3
Rosuvastatin	1.107	0.1726	3																						Ad (100 µM)	2.586	0.0682	3
unpaired t test					unpaired t test					One-Way ANOVA										unpaired t test					One-Way ANOVA										One-Way ANOVA										unpaired t test
Table Analyzed	Fig1A				Table Analyzed	Fig1B				Table Analyzed	Fig1C									Table Analyzed	Fig1D				Table Analyzed	Fig1E									Table Analyzed	Fig1F									Table Analyzed	Fig1G
										Data sets analyzed	CTL	MTX (10 µM)-1h	MTX (10 µM)-4h	MTX (10 µM)-7h	MTX (10 µM)-12h										Data sets analyzed	Ad (0 µM)	Ad (1 µM)	Ad (5 µM)	Ad (10 µM)	Ad (50 µM)	Ad (100 µM)				Data sets analyzed	CTL	Ad (50 µM)-1h	Ad (50 µM)-4h	Ad (50 µM)-7h	Ad (50 µM)-12h
CTL					MTX (0 µM)															CTL																									CTL
vs.					vs.					ANOVA summary										vs.					ANOVA summary										ANOVA summary										vs.
MTX					MTX (1 µM)					F	22.97									MTX					F	62.59									F	49.24									TNF-α
										P value	<0.0001														P value	<0.0001									P value	<0.0001
Unpaired t test					Unpaired t test					P value summary	****									Unpaired t test					P value summary	****									P value summary	****									Unpaired t test
P value	0.0017				P value	<0.0001				Significant diff. among means (P < 0.05)?	Yes									P value	0.0121				Significant diff. among means (P < 0.05)?	Yes									Significant diff. among means (P < 0.05)?	Yes									P value	0.0121
P value summary	**				P value summary	****				R square	0.9019									P value summary	*				R square	0.9631									R square	0.9517									P value summary	*
Significantly different (P < 0.05)?	Yes				Significantly different (P < 0.05)?	Yes														Significantly different (P < 0.05)?	Yes																								Significantly different (P < 0.05)?	Yes
One- or two-tailed P value?	Two-tailed				One- or two-tailed P value?	Two-tailed				Brown-Forsythe test										One- or two-tailed P value?	Two-tailed				Brown-Forsythe test										Brown-Forsythe test										One- or two-tailed P value?	Two-tailed
t, df	t=7.488, df=4				t, df	t=19.52 df=5				F (DFn, DFd)	0.8675 (4, 10)									t, df	t=4.353 df=4				F (DFn, DFd)	0.3975 (5, 12)									F (DFn, DFd)	0.4854 (4, 10)									t, df	t=4.358 df=4
										P value	0.516														P value	0.8413									P value	0.7466
How big is the difference?					How big is the difference?					P value summary	ns									How big is the difference?					P value summary	ns									P value summary	ns									How big is the difference?
Mean of CTL	0.983				Mean ± SEM of MTX (0 µM)	0.9983 ± 0.007115				Are SDs significantly different (P < 0.05)?	No									Mean ± SEM of column A	1.066 ± 0.04679, n=3				Are SDs significantly different (P < 0.05)?	No									Are SDs significantly different (P < 0.05)?	No									Mean ± SEM of column A	0.9407 ± 0.03305, n=3
Mean of MTX	1.364				Mean ± SEM of MTX (1 µM)	1.337 ± 0.01811														Mean ± SEM of column B	1.421 ± 0.06656, n=3																								Mean ± SEM of column B	0.7049 ± 0.04284, n=3
Difference between means (F - E) ± SEM	0.3808 ± 0.05086				Difference between means	0.3383 ± 0.01733				Bartlett's test										Difference between means	0.3541 ± 0.08136				Bartlett's test										Bartlett's test										Difference between means	-0.2358 ± 0.0541
95% confidence interval	0.2396 to 0.522				95% confidence interval	0.2937 to 0.3828				Bartlett's statistic (corrected)										95% confidence interval	0.1283 to 0.58				Bartlett's statistic (corrected)										Bartlett's statistic (corrected)										95% confidence interval	-0.386 to -0.08559
R squared (eta squared)	0.9334				R squared (eta squared)	0.987				P value										R squared (eta squared)	0.8257				P value										P value										R squared (eta squared)	0.8261
										P value summary															P value summary										P value summary
F test to compare variances					F test to compare variances					Are SDs significantly different (P < 0.05)?										F test to compare variances					Are SDs significantly different (P < 0.05)?										Are SDs significantly different (P < 0.05)?										F test to compare variances
F, DFn, Dfd	1.012, 2, 2				F, DFn, Dfd	4.857, 2, 3														F, DFn, Dfd	2.024, 2, 2																								F, DFn, Dfd	1.68, 2, 2
P value	0.9942				P value	0.2292				ANOVA table	SS	DF	MS	F (DFn, DFd)	P value					P value	0.6614				ANOVA table	SS	DF	MS	F (DFn, DFd)	P value					ANOVA table	SS	DF	MS	F (DFn, DFd)	P value					P value	0.7463
P value summary	ns				P value summary	ns				Treatment (between columns)	0.3357	4	0.08393	F (4, 10) = 22.97	P<0.0001					P value summary	ns				Treatment (between columns)	6.817	5	1.363	F (5, 12) = 62.59	P<0.0001					Treatment (between columns)	1.075	4	0.2687	F (4, 10) = 49.24	P<0.0001					P value summary	ns
Significantly different (P < 0.05)?	No				Significantly different (P < 0.05)?	No				Residual (within columns)	0.03653	10	0.003653							Significantly different (P < 0.05)?	No				Residual (within columns)	0.2614	12	0.02178							Residual (within columns)	0.05457	10	0.005457							Significantly different (P < 0.05)?	No
										Total	0.3722	14													Total	7.079	17								Total	1.129	14
Data analyzed					Data analyzed																																								unpaired t test
Sample size, CTL	3				Sample size, MTX	3				Data summary										unpaired t test					Data summary										Data summary										Table Analyzed	Fig1G
Sample size, MTX	3				Sample size, column F	3				Number of treatments (columns)	5									Table Analyzed	Fig1D				Number of treatments (columns)	6									Number of treatments (columns)	5
										Number of values (total)	15														Number of values (total)	18									Number of values (total)	15									TNF-α+MTX
					unpaired t test															MTX																									vs.
					Table Analyzed	Fig1B				Multiple Comparisons										vs.					Multiple Comparisons										Multiple Comparisons										TNF-α
										Number of families	1									MTX+APCP					Number of families	1									Number of families	1
					MTX (0 µM)					Number of comparisons per family	4														Number of comparisons per family	5									Number of comparisons per family	4									Unpaired t test
					vs.					Alpha	0.05									Unpaired t test					Alpha	0.05									Alpha	0.05									P value	0.0331
					MTX (10 µM)															P value	0.0487																								P value summary	*
										Dunnett's multiple comparisons test	Mean Diff.	95.00% CI of diff.	Significant?	Summary	Adjusted P Value	A-?				P value summary	*				Dunnett's multiple comparisons test	Mean Diff.	95.00% CI of diff.	Significant?	Summary	Adjusted P Value	A-?				Dunnett's multiple comparisons test	Mean Diff.	95.00% CI of diff.	Significant?	Summary	Adjusted P Value	A-?				Significantly different (P < 0.05)?	Yes
					Unpaired t test															Significantly different (P < 0.05)?	Yes																								One- or two-tailed P value?	Two-tailed
					P value	<0.0001				CTL vs. MTX (10 µM)-1h	-0.2552	-0.3979 to -0.1125	Yes	**	0.0014	MTX (10 µM)-1h				One- or two-tailed P value?	Two-tailed				Ad (0 µM) vs.Ad (1 µM)	-0.07367	-0.4233 to 0.276	No	ns	0.9559	B	Ad (1 µM)			CTL vs. Ad (50 µM)-1h	-0.1492	-0.3235 to 0.02515	No	ns	0.0983	Ad (50 µM)-1h				t, df	t=3.194 df=4
					P value summary	****				CTL vs. MTX (10 µM)-4h	-0.4313	-0.574 to -0.2886	Yes	****	0.0001	MTX (10 µM)-4h				t, df	t=2.803 df=4				Ad (0 µM) vs.Ad (5 µM)	-0.2705	-0.6201 to 0.07912	No	ns	0.153	C	Ad (5 µM)			CTL vs. Ad (50 µM)-4h	-0.5806	-0.7549 to -0.4062	Yes	****	0.0001	Ad (50 µM)-4h
					Significantly different (P < 0.05)?	Yes				CTL vs. MTX (10 µM)-7h	-0.3475	-0.4902 to -0.2048	Yes	***	0.0001	MTX (10 µM)-7h									Ad (0 µM) vs.Ad (10 µM)	-1.006	-1.355 to -0.6561	Yes	****	0.0001	D	Ad (10 µM)			CTL vs. Ad (50 µM)-7h	-0.6863	-0.8607 to -0.512	Yes	****	0.0001	Ad (50 µM)-7h				How big is the difference?
					One- or two-tailed P value?	Two-tailed				CTL vs. MTX (10 µM)-12h	-0.1631	-0.3057 to -0.02041	Yes	*	0.0255	MTX (10 µM)-12h				How big is the difference?					Ad (0 µM) vs.Ad (50 µM)	-1.336	-1.686 to -0.9867	Yes	****	0.0001	E	Ad (50 µM)			CTL vs. Ad (50 µM)-12h	-0.1631	-0.3374 to 0.01128	No	ns	0.0678	Ad (50 µM)-12h				Mean ± SEM of column B	0.7049 ± 0.04284, n=3
					t, df	t=16.74 df=5														Mean ± SEM of column B	1.421 ± 0.06656, n=3				Ad (0 µM) vs.Ad (100 µM)	-1.541	-1.891 to -1.191	Yes	****	0.0001	F	Ad (100 µM)													Mean ± SEM of column C	0.8938 ± 0.04078, n=3
																				Mean ± SEM of column C	1.112 ± 0.08777, n=3																								Difference between means	0.1889 ± 0.05915
					How big is the difference?					Test details	Mean 1	Mean 2	Mean Diff.	SE of diff.	n1	n2	q	DF		Difference between means	-0.3087 ± 0.1102														Test details	Mean 1	Mean 2	Mean Diff.	SE of diff.	n1	n2	q	DF		95% confidence interval	0.02468 to 0.3531
					Mean ± SEM of MTX (0 µM)	0.9983 ± 0.007115														95% confidence interval	-0.6145 to -0.002892				Test details	Mean 1	Mean 2	Mean Diff.	SE of diff.	n1	n2	q	DF												R squared (eta squared)	0.7183
					Mean ± SEM of MTX (10 µM)	1.456 ± 0.03111				CTL vs. MTX (10 µM)-1h	1.008	1.263	-0.2552	0.04935	3	3	5.171	10		R squared (eta squared)	0.6626														CTL vs. Ad (50 µM)-1h	1.008	1.157	-0.1492	0.06031	3	3	2.474	10
					Difference between means	0.458 ± 0.02736				CTL vs. MTX (10 µM)-4h	1.008	1.439	-0.4313	0.04935	3	3	8.739	10							Ad (0 µM) vs.Ad (1 µM)	1.045	1.119	-0.07367	0.1205	3	3	0.6113	12		CTL vs. Ad (50 µM)-4h	1.008	1.588	-0.5806	0.06031	3	3	9.626	10		F test to compare variances
					95% confidence interval	0.3877 to 0.5283				CTL vs. MTX (10 µM)-7h	1.008	1.355	-0.3475	0.04935	3	3	7.041	10		F test to compare variances					Ad (0 µM) vs.Ad (5 µM)	1.045	1.316	-0.2705	0.1205	3	3	2.245	12		CTL vs. Ad (50 µM)-7h	1.008	1.694	-0.6863	0.06031	3	3	11.38	10		F, DFn, Dfd	1.103, 2, 2
					R squared (eta squared)	0.9825				CTL vs. MTX (10 µM)-12h	1.008	1.171	-0.1631	0.04935	3	3	3.304	10		F, DFn, Dfd	1.739, 2, 2				Ad (0 µM) vs.Ad (10 µM)	1.045	2.051	-1.006	0.1205	3	3	8.346	12		CTL vs. Ad (50 µM)-12h	1.008	1.171	-0.1631	0.06031	3	3	2.704	10		P value	0.9509
																				P value	0.7302				Ad (0 µM) vs.Ad (50 µM)	1.045	2.382	-1.336	0.1205	3	3	11.09	12												P value summary	ns
					F test to compare variances															P value summary	ns				Ad (0 µM) vs.Ad (100 µM)	1.045	2.586	-1.541	0.1205	3	3	12.79	12												Significantly different (P < 0.05)?	No
					F, DFn, Dfd	14.34, 2, 3														Significantly different (P < 0.05)?	No
					P value	0.0583																																							unpaired t test
					P value summary	ns																																							Table Analyzed	Fig1G
					Significantly different (P < 0.05)?	No
																																													TNF-α+Ad
					Data analyzed																																								vs.
					Sample size, MTX	3																																							TNF-α
					Sample size, column F	3
																																													Unpaired t test
					unpaired t test																																								P value	0.0048
					Table Analyzed	Fig1B																																							P value summary	**
																																													Significantly different (P < 0.05)?	Yes
					MTX (0 µM)																																								One- or two-tailed P value?	Two-tailed
					vs.																																								t, df	t=5.671 df=4
					MTX (100 µM)
																																													How big is the difference?
					Unpaired t test																																								Mean ± SEM of column B	0.7049 ± 0.04284, n=3
					P value	<0.0001																																							Mean ± SEM of column D	1.341 ± 0.1037, n=3
					P value summary	****																																							Difference between means	0.6361 ± 0.1122
					Significantly different (P < 0.05)?	Yes																																							95% confidence interval	0.3247 to 0.9475
					One- or two-tailed P value?	Two-tailed																																							R squared (eta squared)	0.8894
					t, df	t=22.4 df=5
																																													F test to compare variances
					How big is the difference?																																								F, DFn, Dfd	5.857, 2, 2
					Mean ± SEM of MTX (0 µM)	0.9983 ± 0.007115																																							P value	0.2917
					Mean ± SEM of MTX (100 µM)	1.34 ± 0.01518																																							P value summary	ns
					Difference between means	0.3413 ± 0.01524																																							Significantly different (P < 0.05)?	No
					95% confidence interval	0.3021 to 0.3805
					R squared (eta squared)	0.9901
					F test to compare variances
					F, DFn, Dfd	3.415, 2, 3
					P value	0.3372
					P value summary	ns
					Significantly different (P < 0.05)?	No
					Data analyzed
					Sample size, MTX	3
					Sample size, column F	3
[truncated: 12 more columns]

## Sheet: Fig2
Fig2A										Fig2B										Fig2C						Fig2D															Fig2E
Sample	Mean	SEM	Sample Size							Sample	Mean	SEM	Sample Size							Sample	Mean	SEM	Sample Size			VCAM-1					ICAM-1					E-Selectin					VCAM-1					ICAM-1
Ctl siRNA	1.036	0.05961	3							Ctl siRNA	0.9945	0.03775	3							Ctl siRNA	1.034	0.1226	3			Sample	Mean	SEM	Sample Size		Sample	Mean	SEM	Sample Size		Sample	Mean	SEM	Sample Size		Sample	Mean	SEM	Sample Size		Sample	Mean	SEM	Sample Size
AdoRA1 siRNA	0.8946	0.02381	3							Ctl siRNA + MTX	1.37	0.03091	3							AdoRA3 siRNA	0.5249	0.02527	3			Ctl siRNA + TNF	1	0	3		Ctl siRNA + TNF	1	0	3		Ctl siRNA + TNF	1	0	3		Ctl siRNA + NS-m + TNF	1	0	3		Ctl siRNA + NS-m + TNF	1	0	3
AdoRA2A siRNA	1.099	0.07321	3							Ctl siRNA + Ad	1.639	0.06811	3							Ctl siRNA + TNF	0.5477	0.05374	3			Ctl siRNA + TNF +MTX	0.724	0.03504	3		AdoRA3 siRNA + TNF	0.6518	0.01419	3		AdoRA3 siRNA + TNF	0.6904	0.06843	3		Ctl siRNA + 181b-m + TNF	0.6628	0.0307	3		Ctl siRNA + 181b-m + TNF	0.7713	0.06513	3
AdoRA2B siRNA	1.132	0.08938	3							AdoRA3 siRNA	0.7002	0.02837	3							AdoRA3 siRNA + TNF	0.5269	0.01046	3			Ctl siRNA + TNF + Ad	0.7027	0.03429	3		Ctl siRNA + TNF +MTX	0.7169	0.06584	3		Ctl siRNA + TNF +MTX	0.6496	0.03108	3		AdoRA3 siRNA + NS-m + TNF	1.298	0.05774	3		AdoRA3 siRNA + NS-m + TNF	1.123	0.03802	3
AdoRA3 siRNA	0.6639	0.04677	3							AdoRA3 siRNA + MTX	0.7023	0.04748	3							Ctl siRNA + TNF +MTX	0.7706	0.03968	3			AdoRA3 siRNA + TNF	1.166	0.05875	3		AdoRA3 siRNA + TNF +MTX	1.084	0.1263	3		AdoRA3 siRNA + TNF +MTX	1.105	0.1087	3		AdoRA3 siRNA + 181b-m + TNF	0.8667	0.06754	3		AdoRA3 siRNA + 181b-m + TNF	0.7627	0.03658	3
										AdoRA3 siRNA + Ad	0.6158	0.01292	3							AdoRA3 siRNA + TNF +MTX	0.382	0.02835	3			AdoRA3 siRNA + TNF +MTX	1.067	0.07081	3		Ctl siRNA + TNF + Ad	1.3	0.1778	3		Ctl siRNA + TNF + Ad	1.252	0.113	3		Ctl siRNA + NS-m + TNF + MTX	0.7393	0.01982	3		Ctl siRNA + NS-m + TNF + MTX	0.7998	0.02765	3
One-Way ANOVA																				Ctl siRNA + TNF + Ad	0.7544	0.02562	3			AdoRA3 siRNA + TNF + Ad	1.103	0.06389	3		AdoRA3 siRNA + TNF + Ad	1.337	0.1424	3		AdoRA3 siRNA + TNF + Ad	1.223	0.2018	3		Ctl siRNA + 181b-m + TNF + MTX	0.7094	0.04667	3		Ctl siRNA + 181b-m + TNF + MTX	0.7484	0.08341	3
Table Analyzed	Fig2A									One-Way ANOVA										AdoRA3 siRNA + TNF + Ad	0.4567	0.01188	3																		AdoRA3 siRNA + NS-m + TNF + MTX	1.189	0.05774	3		AdoRA3 siRNA + NS-m + TNF + MTX	1.148	0.07079	3
Data sets analyzed	Ctl siRNA	AdoRA1 siRNA	AdoRA2A siRNA	AdoRA2B siRNA	AdoRA3 siRNA																					unpaired t test					unpaired t test					unpaired t test					AdoRA3 siRNA + 181b-m + TNF + MTX	0.847	0.03763	3		AdoRA3 siRNA + 181b-m + TNF + MTX	0.9067	0.02352	3
										Table Analyzed	Fig2B									unpaired t test			unpaired t test			Table Analyzed	Fig2D-VCAM-1				Table Analyzed	Fig2D-ICAM-1				Table Analyzed	Fig2D-E-Selectin				Ctl siRNA + NS-m + TNF + Ad	0.7372	0.001626	3		Ctl siRNA + NS-m + TNF + Ad	0.8659	0.02901	3
ANOVA summary										Data sets analyzed	Ctl siRNA	Ctl siRNA + MTX	Ctl siRNA + Ad	AdoRA3 siRNA						Table Analyzed	Fig2C		Table Analyzed	Fig2C																	Ctl siRNA + 181b-m + TNF + Ad	0.7781	0.03801	3		Ctl siRNA + 181b-m + TNF + Ad	0.8913	0.03201	3
F	9.321																									AdoRA3 siRNA + TNF					AdoRA3 siRNA + TNF					AdoRA3 siRNA + TNF					AdoRA3 siRNA + NS-m + TNF +Ad	1.209	0.05916	3		AdoRA3 siRNA + NS-m + TNF +Ad	1.172	0.06617	3
P value	0.0021									ANOVA summary										Ctl siRNA + TNF			Ctl siRNA + TNF +MTX			vs.					vs.					vs.					AdoRA3 siRNA + 181b-m + TNF + Ad	0.8012	0.02919	3		AdoRA3 siRNA + 181b-m + TNF + Ad	0.929	0.1122	3
P value summary	**									F	87.09									vs.			vs.			Ctl siRNA + TNF					Ctl siRNA + TNF					Ctl siRNA + TNF
Significant diff. among means (P < 0.05)?	Yes									P value	<0.0001									Ctl siRNA			Ctl siRNA + TNF																		unpaired t test					unpaired t test
R square	0.7885									P value summary	****															Unpaired t test					Unpaired t test					Unpaired t test					Table Analyzed	Fig2E-VCAM-1				Table Analyzed	Fig2E-ICAM-1
										Significant diff. among means (P < 0.05)?	Yes									Unpaired t test			Unpaired t test			P value	0.0014				P value	<0.0001				P value	0.0106
Brown-Forsythe test										R square	0.9703									P value	0.0221		P value	0.0289		P value summary	**				P value summary	****				P value summary	*				Ctl siRNA + NS-m + TNF + MTX					Ctl siRNA + NS-m + TNF + MTX
F (DFn, DFd)	0.5341 (4, 10)																			P value summary	*		P value summary	*		Significantly different (P < 0.05)?	Yes				Significantly different (P < 0.05)?	Yes				Significantly different (P < 0.05)?	Yes				vs.					vs.
P value	0.7141									Brown-Forsythe test										Significantly different (P < 0.05)?	Yes		Significantly different (P < 0.05)?	Yes		One- or two-tailed P value?	Two-tailed				One- or two-tailed P value?	Two-tailed				One- or two-tailed P value?	Two-tailed				Ctl siRNA + NS-m + TNF					Ctl siRNA + NS-m + TNF
P value summary	ns									F (DFn, DFd)	0.3727 (3, 8)									One- or two-tailed P value?	Two-tailed		One- or two-tailed P value?	Two-tailed		t, df	t=7.876 df=4				t, df	t=24.54 df=4				t, df	t=4.524 df=4
Are SDs significantly different (P < 0.05)?	No									P value	0.7751									t, df	t=3.634 df=4		t, df	t=3.336 df=4																	Unpaired t test					Unpaired t test
										P value summary	ns															How big is the difference?					How big is the difference?					How big is the difference?					P value	0.0002				P value	0.0029
Bartlett's test										Are SDs significantly different (P < 0.05)?	No									How big is the difference?			How big is the difference?			Mean ± SEM of Ctl siRNA + TNF	1 ± 0, n=3				Mean ± SEM of Ctl siRNA + TNF	1 ± 0, n=3				Mean ± SEM of Ctl siRNA + TNF	1 ± 0, n=3				P value summary	***				P value summary	**
Bartlett's statistic (corrected)																				Mean ± SEM of Ctl siRNA	1.034 ± 0.1226, n=3		Mean ± SEM of Ctl siRNA + TNF	0.5477 ± 0.05374, n=3		Mean ± SEM of AdoRA3 siRNA + TNF	0.724 ± 0.03504, n=3				Mean ± SEM of AdoRA3 siRNA + TNF	0.6518 ± 0.01419, n=3				Mean ± SEM of AdoRA3 siRNA + TNF	0.6904 ± 0.06843, n=3				Significantly different (P < 0.05)?	Yes				Significantly different (P < 0.05)?	Yes
P value										Bartlett's test										Mean ± SEM of Ctl siRNA + TNF	0.5477 ± 0.05374, n=3		Mean ± SEM of Ctl siRNA + TNF +MTX	0.7706 ± 0.03968, n=3		Difference between means	-0.276 ± 0.03504				Difference between means	-0.3482 ± 0.01419				Difference between means	-0.3096 ± 0.06843				One- or two-tailed P value?	Two-tailed				One- or two-tailed P value?	Two-tailed
P value summary										Bartlett's statistic (corrected)										Difference between means	-0.4864 ± 0.1338		Difference between means	0.2229 ± 0.06681		95% confidence interval	-0.3733 to -0.1787				95% confidence interval	-0.3876 to -0.3088				95% confidence interval	-0.4996 to -0.1196				t, df	t=13.15 df=4				t, df	t=6.487 df=4
Are SDs significantly different (P < 0.05)?										P value										95% confidence interval	-0.858 to -0.1148		95% confidence interval	0.03739 to 0.4084		R squared (eta squared)	0.9394				R squared (eta squared)	0.9934				R squared (eta squared)	0.8365
										P value summary										R squared (eta squared)	0.7675		R squared (eta squared)	0.7356																	How big is the difference?					How big is the difference?
ANOVA table	SS	DF	MS	F (DFn, DFd)	P value					Are SDs significantly different (P < 0.05)?																F test to compare variances					F test to compare variances					F test to compare variances					Mean ± SEM of Ctl siRNA + NS-m + TNF	1 ± 0, n=3				Mean ± SEM of Ctl siRNA + NS-m + TNF	1 ± 0, n=3
Treatment (between columns)	0.4397	4	0.1099	F (4, 10) = 9.321	P=0.0021															F test to compare variances			F test to compare variances			F, DFn, Dfd	Infinity, 2, 2				F, DFn, Dfd	Infinity, 2, 2				F, DFn, Dfd	Infinity, 2, 2				Mean ± SEM of Ctl siRNA + NS-m + TNF + MTX	0.7393 ± 0.01982, n=3				Mean ± SEM of Ctl siRNA + NS-m + TNF + MTX	0.7627 ± 0.03658, n=3
Residual (within columns)	0.1179	10	0.01179							ANOVA table	SS	DF	MS	F (DFn, DFd)	P value					F, DFn, Dfd	5.202, 2, 2		F, DFn, Dfd	1.834, 2, 2		P value	<0.0001				P value	<0.0001				P value	<0.0001				Difference between means	-0.2607 ± 0.01982				Difference between means	-0.2373 ± 0.03658
Total	0.5577	14								Treatment (between columns)	1.533	3	0.5111	F (3, 8) = 87.09	P<0.0001					P value	0.3225		P value	0.7056		P value summary	****				P value summary	****				P value summary	****				95% confidence interval	-0.3157 to -0.2056				95% confidence interval	-0.3389 to -0.1358
										Residual (within columns)	0.04695	8	0.005868							P value summary	ns		P value summary	ns		Significantly different (P < 0.05)?	Yes				Significantly different (P < 0.05)?	Yes				Significantly different (P < 0.05)?	Yes				R squared (eta squared)	0.9774				R squared (eta squared)	0.9132
Data summary										Total	1.58	11								Significantly different (P < 0.05)?	No		Significantly different (P < 0.05)?	No
Number of treatments (columns)	5																									unpaired t test					unpaired t test					unpaired t test					F test to compare variances					F test to compare variances
Number of values (total)	15									Data summary										unpaired t test						Table Analyzed	Fig2D-VCAM-1				Table Analyzed	Fig2D-ICAM-1				Table Analyzed	Fig2D-E-Selectin				F, DFn, Dfd	Infinity, 2, 2				F, DFn, Dfd	Infinity, 2, 2
										Number of treatments (columns)	4									Table Analyzed	Fig2C																				P value	<0.0001				P value	<0.0001
										Number of values (total)	12															Ctl siRNA + TNF + Ad					Ctl siRNA + TNF + Ad					Ctl siRNA + TNF + Ad					P value summary	****				P value summary	****
Multiple Comparisons																				Ctl siRNA + TNF + Ad						vs.					vs.					vs.					Significantly different (P < 0.05)?	Yes				Significantly different (P < 0.05)?	Yes
Number of families	1									Multiple Comparisons										vs.						Ctl siRNA + TNF					Ctl siRNA + TNF					Ctl siRNA + TNF
Number of comparisons per family	4									Number of families	1									Ctl siRNA + TNF																					unpaired t test					unpaired t test
Alpha	0.05									Number of comparisons per family	3															Unpaired t test					Unpaired t test					Unpaired t test					Table Analyzed	Fig2E-VCAM-1				Table Analyzed	Fig2E-ICAM-1
										Alpha	0.05									Unpaired t test						P value	0.001				P value	0.0126				P value	0.0004
Dunnett's multiple comparisons test	Mean Diff.	95.00% CI of diff.	Significant?	Summary	Adjusted P Value	A-?														P value	0.0256					P value summary	***				P value summary	*				P value summary	***				Ctl siRNA + NS-m + TNF + Ad					Ctl siRNA + NS-m + TNF + Ad
										Dunnett's multiple comparisons test	Mean Diff.	95.00% CI of diff.	Significant?	Summary	Adjusted P Value	A-?				P value summary	*					Significantly different (P < 0.05)?	Yes				Significantly different (P < 0.05)?	Yes				Significantly different (P < 0.05)?	Yes				vs.					vs.
Ctl siRNA vs. AdoRA1 siRNA	0.1416	-0.1147 to 0.3979	No	ns	0.3655	AdoRA1 siRNA														Significantly different (P < 0.05)?	Yes					One- or two-tailed P value?	Two-tailed				One- or two-tailed P value?	Two-tailed				One- or two-tailed P value?	Two-tailed				Ctl siRNA + NS-m + TNF					Ctl siRNA + NS-m + TNF
Ctl siRNA vs. AdoRA2A siRNA	-0.06301	-0.3193 to 0.1933	No	ns	0.8836	AdoRA2A siRNA				Ctl siRNA vs. Ctl siRNA + MTX	-0.3754	-0.5555 to -0.1952	Yes	***	0.0008	Ctl siRNA + MTX				One- or two-tailed P value?	Two-tailed					t, df	t=8.67 df=4				t, df	t=4.3 df=4				t, df	t=11.28 df=4
Ctl siRNA vs. AdoRA2B siRNA	-0.09581	-0.3521 to 0.1605	No	ns	0.6674	AdoRA2B siRNA				Ctl siRNA vs. Ctl siRNA + Ad	-0.6442	-0.8243 to -0.464	Yes	****	0.0001	Ctl siRNA + Ad				t, df	t=3.471 df=4																				Unpaired t test					Unpaired t test
Ctl siRNA vs. AdoRA3 siRNA	0.3723	0.116 to 0.6286	Yes	**	0.0061	AdoRA3 siRNA				Ctl siRNA vs. AdoRA3 siRNA	0.2944	0.1143 to 0.4745	Yes	**	0.0039	AdoRA3 siRNA										How big is the difference?					How big is the difference?					How big is the difference?					P value	<0.0001				P value	0.0099
																				How big is the difference?						Mean ± SEM of Ctl siRNA + TNF	1 ± 0, n=3				Mean ± SEM of Ctl siRNA + TNF	1 ± 0, n=3				Mean ± SEM of Ctl siRNA + TNF	1 ± 0, n=3				P value summary	****				P value summary	**
																				Mean ± SEM of Ctl siRNA + TNF	0.5477 ± 0.05374, n=3					Mean ± SEM of Ctl siRNA + TNF + Ad	0.7027 ± 0.03429, n=3				Mean ± SEM of Ctl siRNA + TNF + Ad	0.7169 ± 0.06584, n=3				Mean ± SEM of Ctl siRNA + TNF + Ad	0.6496 ± 0.03108, n=3				Significantly different (P < 0.05)?	Yes				Significantly different (P < 0.05)?	Yes
Test details	Mean 1	Mean 2	Mean Diff.	SE of diff.	n1	n2	q	DF		Test details	Mean 1	Mean 2	Mean Diff.	SE of diff.	n1	n2	q	DF		Mean ± SEM of Ctl siRNA + TNF + Ad	0.7544 ± 0.02562, n=3					Difference between means	-0.2973 ± 0.03429				Difference between means	-0.2831 ± 0.06584				Difference between means	-0.3504 ± 0.03108				One- or two-tailed P value?	Two-tailed				One- or two-tailed P value?	Two-tailed
																				Difference between means	0.2067 ± 0.05954					95% confidence interval	-0.3926 to -0.2021				95% confidence interval	-0.4659 to -0.1003				95% confidence interval	-0.4367 to -0.2641				t, df	t=161.6 df=4				t, df	t=4.623 df=4
Ctl siRNA vs. AdoRA1 siRNA	1.036	0.8946	0.1416	0.08867	3	3	1.597	10		Ctl siRNA vs. Ctl siRNA + MTX	0.9945	1.37	-0.3754	0.06255	3	3	6.001	8		95% confidence interval	0.04135 to 0.372					R squared (eta squared)	0.9495				R squared (eta squared)	0.8222				R squared (eta squared)	0.9695
Ctl siRNA vs. AdoRA2A siRNA	1.036	1.099	-0.06301	0.08867	3	3	0.7106	10		Ctl siRNA vs. Ctl siRNA + Ad	0.9945	1.639	-0.6442	0.06255	3	3	10.3	8		R squared (eta squared)	0.7507																				How big is the difference?					How big is the difference?
Ctl siRNA vs. AdoRA2B siRNA	1.036	1.132	-0.09581	0.08867	3	3	1.081	10		Ctl siRNA vs. AdoRA3 siRNA	0.9945	0.7002	0.2944	0.06255	3	3	4.706	8								F test to compare variances					F test to compare variances					F test to compare variances					Mean ± SEM of Ctl siRNA + NS-m + TNF	1 ± 0, n=3				Mean ± SEM of Ctl siRNA + NS-m + TNF	1 ± 0, n=3
Ctl siRNA vs. AdoRA3 siRNA	1.036	0.6639	0.3723	0.08867	3	3	4.198	10												F test to compare variances						F, DFn, Dfd	Infinity, 2, 2				F, DFn, Dfd	Infinity, 2, 2				F, DFn, Dfd	Infinity, 2, 2				Mean ± SEM of Ctl siRNA + NS-m + TNF + Ad	0.7372 ± 0.001626, n=3				Mean ± SEM of Ctl siRNA + NS-m + TNF + Ad	0.8659 ± 0.02901, n=3
										unpaired t test			unpaired t test							F, DFn, Dfd	4.401, 2, 2					P value	<0.0001				P value	<0.0001				P value	<0.0001				Difference between means	-0.2628 ± 0.001626				Difference between means	-0.1341 ± 0.02901
										Table Analyzed	Fig2B		Table Analyzed	Fig2B						P value	0.3703					P value summary	****				P value summary	****				P value summary	****				95% confidence interval	-0.2673 to -0.2583				95% confidence interval	-0.2147 to -0.05357
																				P value summary	ns					Significantly different (P < 0.05)?	Yes				Significantly different (P < 0.05)?	Yes				Significantly different (P < 0.05)?	Yes				R squared (eta squared)	0.9998				R squared (eta squared)	0.8424
										AdoRA3 siRNA + MTX			AdoRA3 siRNA + Ad							Significantly different (P < 0.05)?	No
										vs.			vs.													unpaired t test															F test to compare variances					F test to compare variances
										Ctl siRNA + MTX			Ctl siRNA + Ad													Table Analyzed	Fig2D-VCAM-1														F, DFn, Dfd	Infinity, 2, 2				F, DFn, Dfd	Infinity, 2, 2
																																									P value	<0.0001				P value	<0.0001
										Unpaired t test			Unpaired t test													AdoRA3 siRNA + TNF															P value summary	****				P value summary	****
										P value	0.0003		P value	0.0001												vs.															Significantly different (P < 0.05)?	Yes				Significantly different (P < 0.05)?	Yes
										P value summary	***		P value summary	***												Ctl siRNA + TNF
										Significantly different (P < 0.05)?	Yes		Significantly different (P < 0.05)?	Yes																											unpaired t test					unpaired t test
										One- or two-tailed P value?	Two-tailed		One- or two-tailed P value?	Two-tailed												Unpaired t test															Table Analyzed	Fig2E-VCAM-1				Table Analyzed	Fig2E-ICAM-1
										t, df	t=11.78 df=4		t, df	t=14.75 df=4												P value	0.0476
																										P value summary	*														AdoRA3 siRNA + NS-m + TNF + MTX					AdoRA3 siRNA + NS-m + TNF + MTX
										How big is the difference?			How big is the difference?													Significantly different (P < 0.05)?	Yes														vs.					vs.
										Mean ± SEM of Ctl siRNA + MTX	1.37 ± 0.03091, n=3		Mean ± SEM of Ctl siRNA + Ad	1.639 ± 0.06811, n=3												One- or two-tailed P value?	Two-tailed														Ctl siRNA + NS-m + TNF + MTX					Ctl siRNA + NS-m + TNF + MTX
										Mean ± SEM of AdoRA3 siRNA + MTX	0.7023 ± 0.04748, n=3		Mean ± SEM of AdoRA3 siRNA + Ad	0.6158 ± 0.01292, n=3												t, df	t=2.826 df=4
										Difference between means	-0.6676 ± 0.05666		Difference between means	-1.023 ± 0.06933																											Unpaired t test					Unpaired t test
										95% confidence interval	-0.8249 to -0.5103		95% confidence interval	-1.215 to -0.8304												How big is the difference?															P value	0.0018				P value	0.0102
										R squared (eta squared)	0.972		R squared (eta squared)	0.982												Mean ± SEM of Ctl siRNA + TNF	1 ± 0, n=3														P value summary	**				P value summary	*
																										Mean ± SEM of AdoRA3 siRNA + TNF	1.166 ± 0.05875, n=3														Significantly different (P < 0.05)?	Yes				Significantly different (P < 0.05)?	Yes
										F test to compare variances			F test to compare variances													Difference between means	0.166 ± 0.05875														One- or two-tailed P value?	Two-tailed				One- or two-tailed P value?	Two-tailed
										F, DFn, Dfd	2.358, 2, 2		F, DFn, Dfd	27.78, 2, 2												95% confidence interval	0.002896 to 0.3291														t, df	t=7.365 df=4				t, df	t=4.58 df=4
										P value	0.5955		P value	0.0695												R squared (eta squared)	0.6662
										P value summary	ns		P value summary	ns																											How big is the difference?					How big is the difference?
										Significantly different (P < 0.05)?	No		Significantly different (P < 0.05)?	No												F test to compare variances															Mean ± SEM of Ctl siRNA + NS-m + TNF + MTX	0.7393 ± 0.01982, n=3				Mean ± SEM of Ctl siRNA + NS-m + TNF + MTX	0.7998 ± 0.02765, n=3
																										F, DFn, Dfd	Infinity, 2, 2														Mean ± SEM of AdoRA3 siRNA + NS-m + TNF + MTX	1.189 ± 0.05774, n=3				Mean ± SEM of AdoRA3 siRNA + NS-m + TNF + MTX	1.148 ± 0.07079, n=3
																										P value	<0.0001														Difference between means	0.4496 ± 0.06104				Difference between means	0.3481 ± 0.076
																										P value summary	****														95% confidence interval	0.2801 to 0.619				95% confidence interval	0.1371 to 0.5591
																										Significantly different (P < 0.05)?	Yes														R squared (eta squared)	0.9313				R squared (eta squared)	0.8399
																																									F test to compare variances					F test to compare variances
																																									F, DFn, Dfd	8.482, 2, 2				F, DFn, Dfd	6.555, 2, 2
																																									P value	0.2109				P value	0.2647
																																									P value summary	ns				P value summary	ns
																																									Significantly different (P < 0.05)?	No				Significantly different (P < 0.05)?	No
																																									unpaired t test					unpaired t test
																																									Table Analyzed	Fig2E-VCAM-1				Table Analyzed	Fig2E-ICAM-1
																																									AdoRA3 siRNA + 181b-m + TNF + MTX					AdoRA3 siRNA + 181b-m + TNF + MTX
																																									vs.					vs.
																																									AdoRA3 siRNA + NS-m + TNF + MTX					AdoRA3 siRNA + NS-m + TNF + MTX
																																									Unpaired t test					Unpaired t test
																																									P value	0.0077				P value	0.0319
																																									P value summary	**				P value summary	*
																																									Significantly different (P < 0.05)?	Yes				Significantly different (P < 0.05)?	Yes
																																									One- or two-tailed P value?	Two-tailed				One- or two-tailed P value?	Two-tailed
																																									t, df	t=4.961 df=4				t, df	t=3.234 df=4
																																									How big is the difference?					How big is the difference?
																																									Mean ± SEM of AdoRA3 siRNA + NS-m + TNF + MTX	1.189 ± 0.05774, n=3				Mean ± SEM of AdoRA3 siRNA + NS-m + TNF + MTX	1.148 ± 0.07079, n=3
																																									Mean ± SEM of AdoRA3 siRNA + 181b-m + TNF + MTX	0.847 ± 0.03763, n=3				Mean ± SEM of AdoRA3 siRNA + 181b-m + TNF + MTX	0.9067 ± 0.02352, n=3
																																									Difference between means	-0.3419 ± 0.06891				Difference between means	-0.2412 ± 0.0746
																																									95% confidence interval	-0.5332 to -0.1505				95% confidence interval	-0.4483 to -0.03411
																																									R squared (eta squared)	0.8602				R squared (eta squared)	0.7233
																																									F test to compare variances					F test to compare variances
																																									F, DFn, Dfd	2.354, 2, 2				F, DFn, Dfd	9.06, 2, 2
																																									P value	0.5963				P value	0.1988
																																									P value summary	ns				P value summary	ns
																																									Significantly different (P < 0.05)?	No				Significantly different (P < 0.05)?	No
																																									unpaired t test					unpaired t test
																																									Table Analyzed	Fig2E-VCAM-1				Table Analyzed	Fig2E-ICAM-1
																																									AdoRA3 siRNA + NS-m + TNF +Ad					AdoRA3 siRNA + NS-m + TNF +Ad
																																									vs.					vs.
																																									Ctl siRNA + NS-m + TNF + Ad					Ctl siRNA + NS-m + TNF + Ad
																																									Unpaired t test					Unpaired t test
																																									P value	0.0013				P value	0.0133
																																									P value summary	**				P value summary	*
																																									Significantly different (P < 0.05)?	Yes				Significantly different (P < 0.05)?	Yes
																																									One- or two-tailed P value?	Two-tailed				One- or two-tailed P value?	Two-tailed
																																									t, df	t=7.971 df=4				t, df	t=4.235 df=4
																																									How big is the difference?					How big is the difference?
																																									Mean ± SEM of Ctl siRNA + NS-m + TNF + Ad	0.7372 ± 0.001626, n=3				Mean ± SEM of Ctl siRNA + NS-m + TNF + Ad	0.8659 ± 0.02901, n=3
																																									Mean ± SEM of AdoRA3 siRNA + NS-m + TNF +Ad	1.209 ± 0.05916, n=3				Mean ± SEM of AdoRA3 siRNA + NS-m + TNF +Ad	1.172 ± 0.06617, n=3
																																									Difference between means	0.4717 ± 0.05918				Difference between means	0.306 ± 0.07225
																																									95% confidence interval	0.3074 to 0.636				95% confidence interval	0.1053 to 0.5066
																																									R squared (eta squared)	0.9408				R squared (eta squared)	0.8176
																																									F test to compare variances					F test to compare variances
																																									F, DFn, Dfd	1324, 2, 2				F, DFn, Dfd	5.203, 2, 2
																																									P value	0.0015				P value	0.3224
																																									P value summary	**				P value summary	ns
																																									Significantly different (P < 0.05)?	Yes				Significantly different (P < 0.05)?	No
																																									unpaired t test
																																									Table Analyzed	Fig2E-VCAM-1
																																									AdoRA3 siRNA + 181b-m + TNF + Ad
																																									vs.
																																									AdoRA3 siRNA + NS-m + TNF +Ad
																																									Unpaired t test
																																									P value	0.0035
																																									P value summary	**
																																									Significantly different (P < 0.05)?	Yes
																																									One- or two-tailed P value?	Two-tailed
																																									t, df	t=6.181 df=4
																																									How big is the difference?
																																									Mean ± SEM of AdoRA3 siRNA + NS-m + TNF +Ad	1.209 ± 0.05916, n=3
																																									Mean ± SEM of AdoRA3 siRNA + 181b-m + TNF + Ad	0.8012 ± 0.02919, n=3
																																									Difference between means	-0.4078 ± 0.06597
																																									95% confidence interval	-0.5909 to -0.2246
																																									R squared (eta squared)	0.9052
																																									F test to compare variances
																																									F, DFn, Dfd	4.107, 2, 2
																																									P value	0.3916
																																									P value summary	ns
																																									Significantly different (P < 0.05)?	No

## Sheet: Fig3
Fig3A																																									Fig3B
Luc-5.1kb											Luc-3.7kb										Luc-2.5kb										Luc-0.6kb										Luc-606
Sample	Mean	SEM	Sample Size								Sample	Mean	SEM	Sample Size							Sample	Mean	SEM	Sample Size							Sample	Mean	SEM	Sample Size							Sample	Mean	SEM	Sample Size
Control	0.9051	0.04742	8								Control	0.9839	0.04079	8							Control	1.007	0.04898	8							Control	1.01	0.01413	8							Control	0.951	0.04742	7
MTX	1.333	0.04096	8								MTX	1.719	0.09966	8							MTX	1.903	0.1241	8							MTX	1.532	0.04274	8							MTX	1.333	0.04096	8
Ad	1.376	0.08715	8								Ad	1.338	0.07781	8							Ad	1.649	0.08843	8							Ad	1.431	0.03116	8							Ad	1.424	0.08427	8
One-Way ANOVA											One-Way ANOVA										One-Way ANOVA										One-Way ANOVA										One-Way ANOVA
Table Analyzed	Fig3A-5.1kb										Table Analyzed	Fig3A-3.7kb									Table Analyzed	Fig3A-2.5kb									Table Analyzed	Fig3A-0.6kb									Table Analyzed	Fig3B-606
Data sets analyzed	Control	MTX	Ad								Data sets analyzed	Control	MTX	Ad							Data sets analyzed	Control	MTX	Ad							Data sets analyzed	Control	MTX	Ad							Data sets analyzed	Control	MTX	Ad
ANOVA summary											ANOVA summary										ANOVA summary										ANOVA summary										ANOVA summary
F	17.66										F	22.98									F	24.95									F	76.77									F	22.87
P value	<0.0001										P value	<0.0001									P value	<0.0001									P value	<0.0001									P value	<0.0001
P value summary	****										P value summary	****									P value summary	****									P value summary	****									P value summary	****
Significant diff. among means (P < 0.05)?	Yes										Significant diff. among means (P < 0.05)?	Yes									Significant diff. among means (P < 0.05)?	Yes									Significant diff. among means (P < 0.05)?	Yes									Significant diff. among means (P < 0.05)?	Yes
R square	0.6272										R square	0.6864									R square	0.7038									R square	0.8797									R square	0.6958
Brown-Forsythe test											Brown-Forsythe test										Brown-Forsythe test										Brown-Forsythe test										Brown-Forsythe test
F (DFn, DFd)	1.493 (2, 21)										F (DFn, DFd)	1.427 (2, 21)									F (DFn, DFd)	1.226 (2, 21)									F (DFn, DFd)	2.127 (2, 21)									F (DFn, DFd)	0.8081 (2, 20)
P value	0.2477										P value	0.2623									P value	0.3136									P value	0.1442									P value	0.4597
P value summary	ns										P value summary	ns									P value summary	ns									P value summary	ns									P value summary	ns
Are SDs significantly different (P < 0.05)?	No										Are SDs significantly different (P < 0.05)?	No									Are SDs significantly different (P < 0.05)?	No									Are SDs significantly different (P < 0.05)?	No									Are SDs significantly different (P < 0.05)?	No
Bartlett's test											Bartlett's test										Bartlett's test										Bartlett's test										Bartlett's test
Bartlett's statistic (corrected)	4.486										Bartlett's statistic (corrected)	4.679									Bartlett's statistic (corrected)	5.057									Bartlett's statistic (corrected)	6.815									Bartlett's statistic (corrected)	3.042
P value	0.1061										P value	0.0964									P value	0.0798									P value	0.0331									P value	0.2185
P value summary	ns										P value summary	ns									P value summary	ns									P value summary	*									P value summary	ns
Are SDs significantly different (P < 0.05)?	No										Are SDs significantly different (P < 0.05)?	No									Are SDs significantly different (P < 0.05)?	No									Are SDs significantly different (P < 0.05)?	Yes									Are SDs significantly different (P < 0.05)?	No
ANOVA table	SS	DF	MS	F (DFn, DFd)	P value						ANOVA table	SS	DF	MS	F (DFn, DFd)	P value					ANOVA table	SS	DF	MS	F (DFn, DFd)	P value					ANOVA table	SS	DF	MS	F (DFn, DFd)	P value					ANOVA table	SS	DF	MS	F (DFn, DFd)	P value
Treatment (between columns)	1.085	2	0.5427	F (2, 21) = 17.66	P<0.0001						Treatment (between columns)	2.163	2	1.082	F (2, 21) = 22.98	P<0.0001					Treatment (between columns)	3.41	2	1.705	F (2, 21) = 24.95	P<0.0001					Treatment (between columns)	1.227	2	0.6136	F (2, 21) = 76.77	P<0.0001					Treatment (between columns)	1.185	2	0.5925	F (2, 20) = 22.87	P<0.0001
Residual (within columns)	0.6453	21	0.03073								Residual (within columns)	0.9884	21	0.04707							Residual (within columns)	1.435	21	0.06834							Residual (within columns)	0.1678	21	0.007993							Residual (within columns)	0.5182	20	0.02591
Total	1.731	23									Total	3.152	23								Total	4.845	23								Total	1.395	23								Total	1.703	22
Data summary											Data summary										Data summary										Data summary										Data summary
Number of treatments (columns)	3										Number of treatments (columns)	3									Number of treatments (columns)	3									Number of treatments (columns)	3									Number of treatments (columns)	3
Number of values (total)	24										Number of values (total)	24									Number of values (total)	24									Number of values (total)	24									Number of values (total)	23
Multiple Comparisons											Multiple Comparisons										Multiple Comparisons										Multiple Comparisons										Multiple Comparisons
Number of families	1										Number of families	1									Number of families	1									Number of families	1									Number of families	1
Number of comparisons per family	2										Number of comparisons per family	2									Number of comparisons per family	2									Number of comparisons per family	2									Number of comparisons per family	2
Alpha	0.05										Alpha	0.05									Alpha	0.05									Alpha	0.05									Alpha	0.05
Dunnett's multiple comparisons test	Mean Diff.	95.00% CI of diff.	Significant?	Summary	Adjusted P Value	Control-?					Dunnett's multiple comparisons test	Mean Diff.	95.00% CI of diff.	Significant?	Summary	Adjusted P Value	Control-?				Dunnett's multiple comparisons test	Mean Diff.	95.00% CI of diff.	Significant?	Summary	Adjusted P Value	Control-?				Dunnett's multiple comparisons test	Mean Diff.	95.00% CI of diff.	Significant?	Summary	Adjusted P Value	Control-?				Dunnett's multiple comparisons test	Mean Diff.	95.00% CI of diff.	Significant?	Summary	Adjusted P Value	Control-?
Control vs. MTX	-0.4281	-0.6358 to -0.2203	Yes	***	0.0002	MTX					Control vs. MTX	-0.7353	-0.9924 to -0.4781	Yes	****	0.0001	MTX				Control vs. MTX	-0.8956	-1.205 to -0.5858	Yes	****	0.0001	MTX				Control vs. MTX	-0.5222	-0.6281 to -0.4162	Yes	****	0.0001	MTX				Control vs. MTX	-0.4281	-0.6195 to -0.2366	Yes	****	0.0001	MTX
Control vs. Ad	-0.4711	-0.6788 to -0.2633	Yes	****	0.0001	Ad					Control vs. Ad	-0.3538	-0.6109 to -0.09668	Yes	**	0.0071	Ad				Control vs. Ad	-0.6421	-0.9519 to -0.3323	Yes	***	0.0001	Ad				Control vs. Ad	-0.4211	-0.5271 to -0.3152	Yes	****	0.0001	Ad				Control vs. Ad	-0.5187	-0.7169 to -0.3205	Yes	****	0.0001	Ad
Test details	Mean 1	Mean 2	Mean Diff.	SE of diff.	n1	n2	q	DF			Test details	Mean 1	Mean 2	Mean Diff.	SE of diff.	n1	n2	q	DF		Test details	Mean 1	Mean 2	Mean Diff.	SE of diff.	n1	n2	q	DF		Test details	Mean 1	Mean 2	Mean Diff.	SE of diff.	n1	n2	q	DF		Test details	Mean 1	Mean 2	Mean Diff.	SE of diff.	n1	n2	q	DF
Control vs. MTX	0.9051	1.333	-0.4281	0.08765	8	8	4.884	21			Control vs. MTX	0.9839	1.719	-0.7353	0.1085	8	8	6.778	21		Control vs. MTX	1.007	1.903	-0.8956	0.1307	8	8	6.852	21		Control vs. MTX	1.01	1.532	-0.5222	0.0447	8	8	11.68	21		Control vs. MTX	0.9051	1.333	-0.4281	0.08048	8	8	5.319	20
Control vs. Ad	0.9051	1.376	-0.4711	0.08765	8	8	5.375	21			Control vs. Ad	0.9839	1.338	-0.3538	0.1085	8	8	3.262	21		Control vs. Ad	1.007	1.649	-0.6421	0.1307	8	8	4.912	21		Control vs. Ad	1.01	1.431	-0.4211	0.0447	8	8	9.421	21		Control vs. Ad	0.9051	1.424	-0.5187	0.0833	8	7	6.227	20
