# Supplementary figures and images for: Methotrexate attenuates vascular inflammation through an adenosine-microRNA-dependent pathway
Source: eLife journal article supplement (doi:10.7554/elife.58064), 2021-01-08

# Figure 2-figure supplement 1

**A**

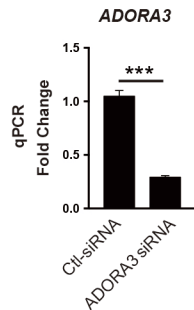

**B**

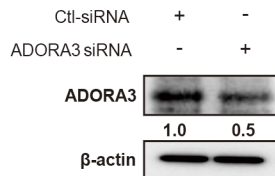

**C**

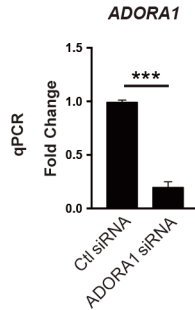

**D**

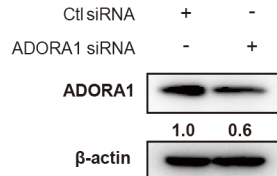

**E**

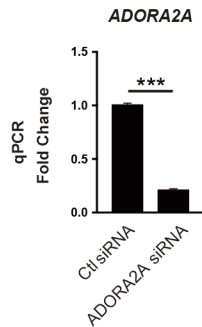

**F**

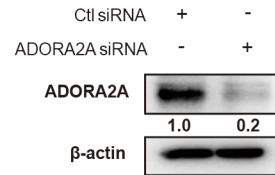

**G**

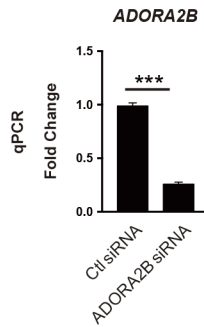

**H**

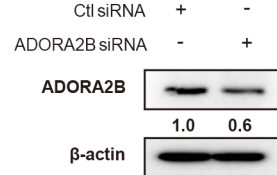

Supplement: supp [file elife-58064-supp-v1.zip › elife_poa_e58064_Figure_2_Supplement_1.pdf]
